# Supplementary material
Source: ML conference proceedings conference paper supplement (https://openreview.net/forum?id=mS7xin7BPK)

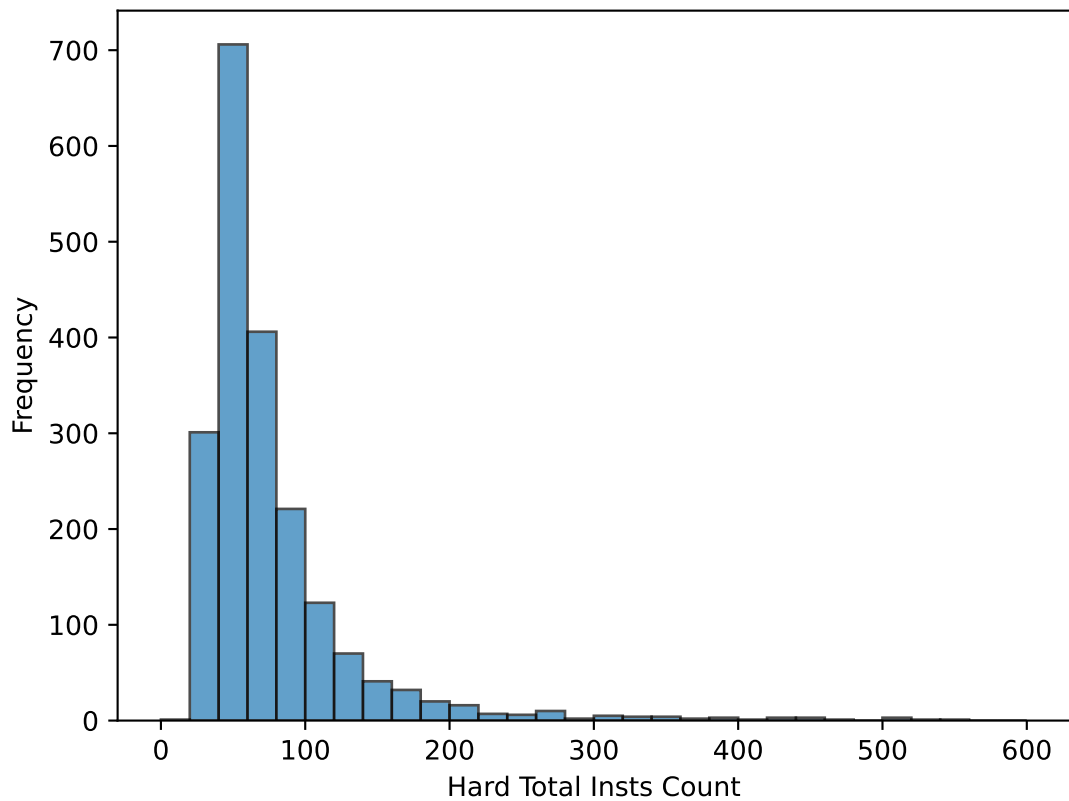

Supplement: supplementary_material [file attachment]

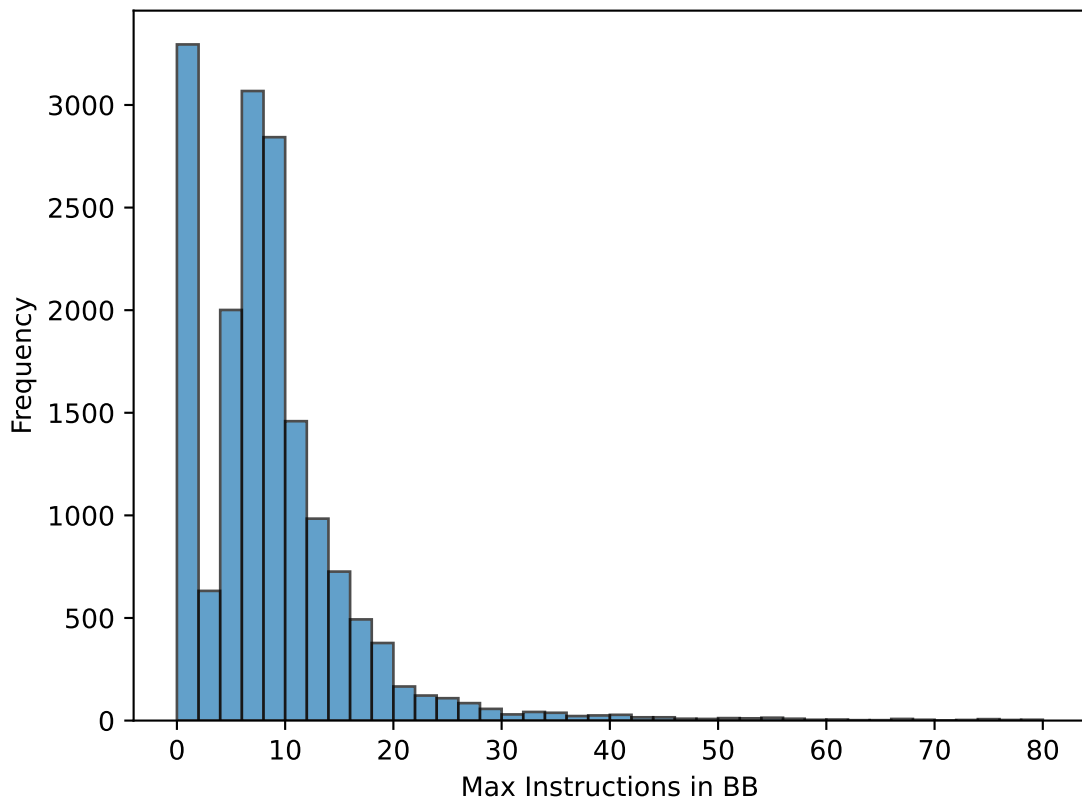

Supplement: supplementary_material [file attachment]

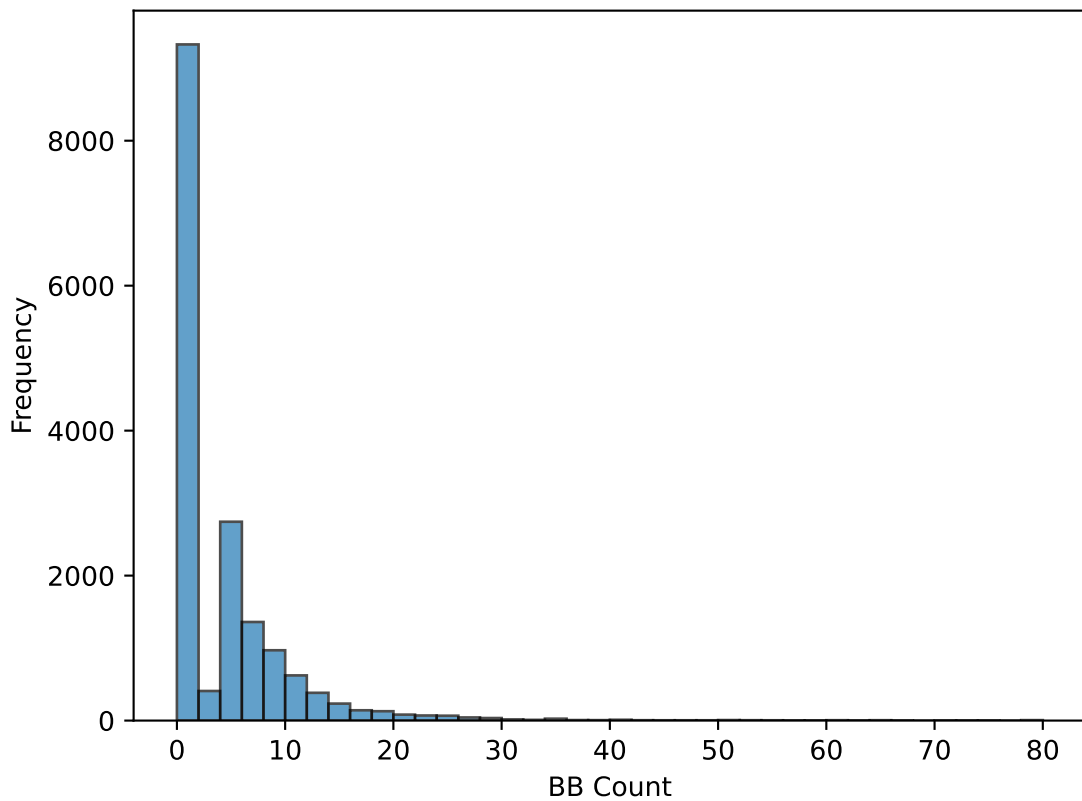

Supplement: supplementary_material [file attachment]

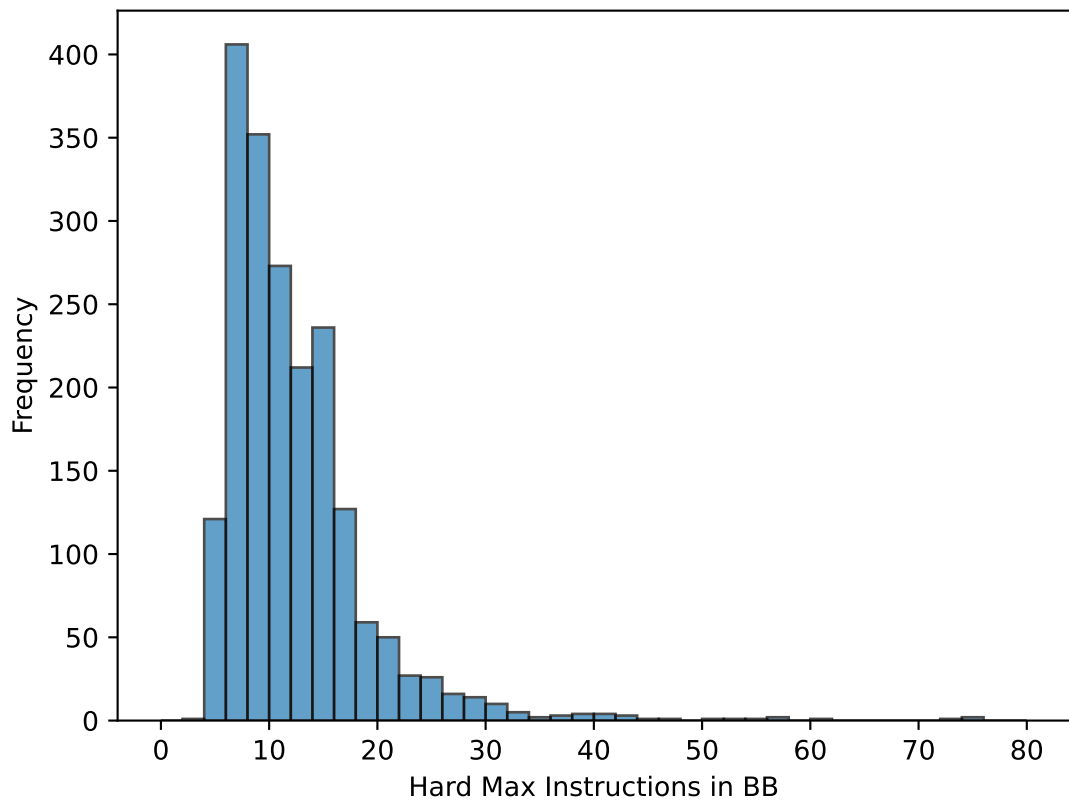

Supplement: supplementary_material [file attachment]

# Ablation Study on Cases Complexity

## Easy

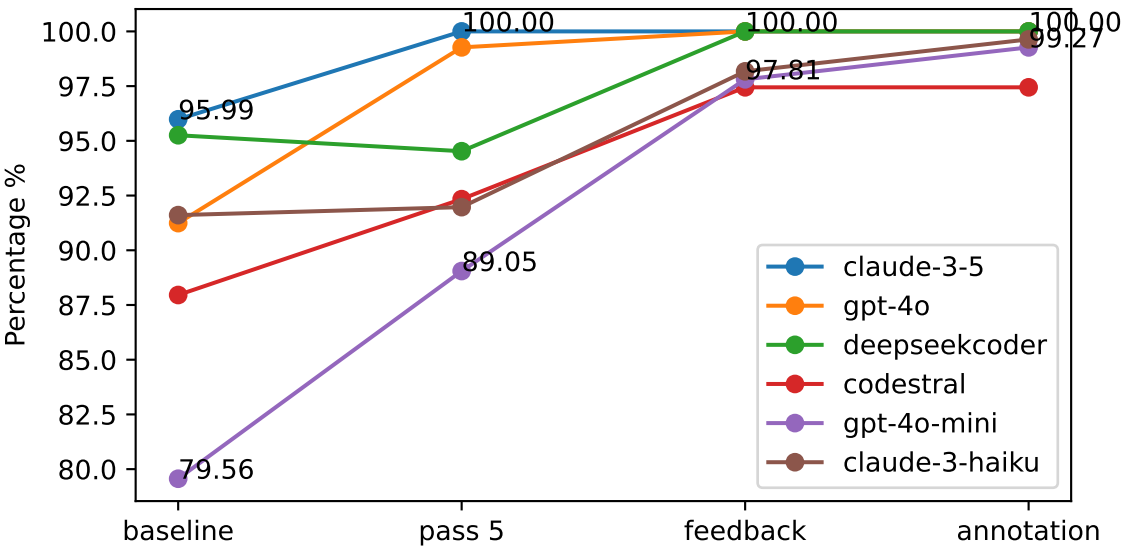

## Medium

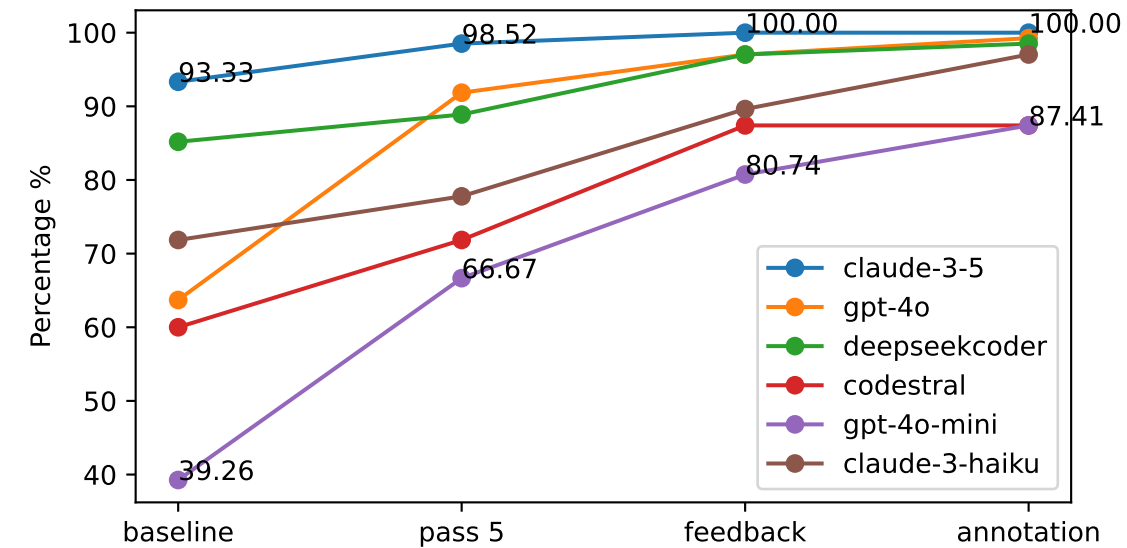

## Hard

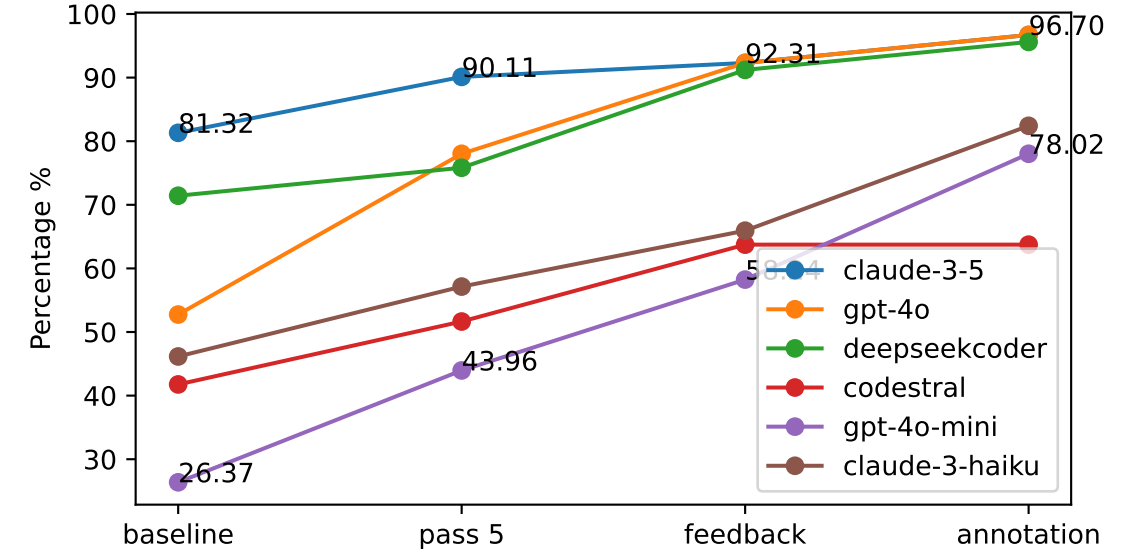

Supplement: supplementary_material [file attachment]

Easy

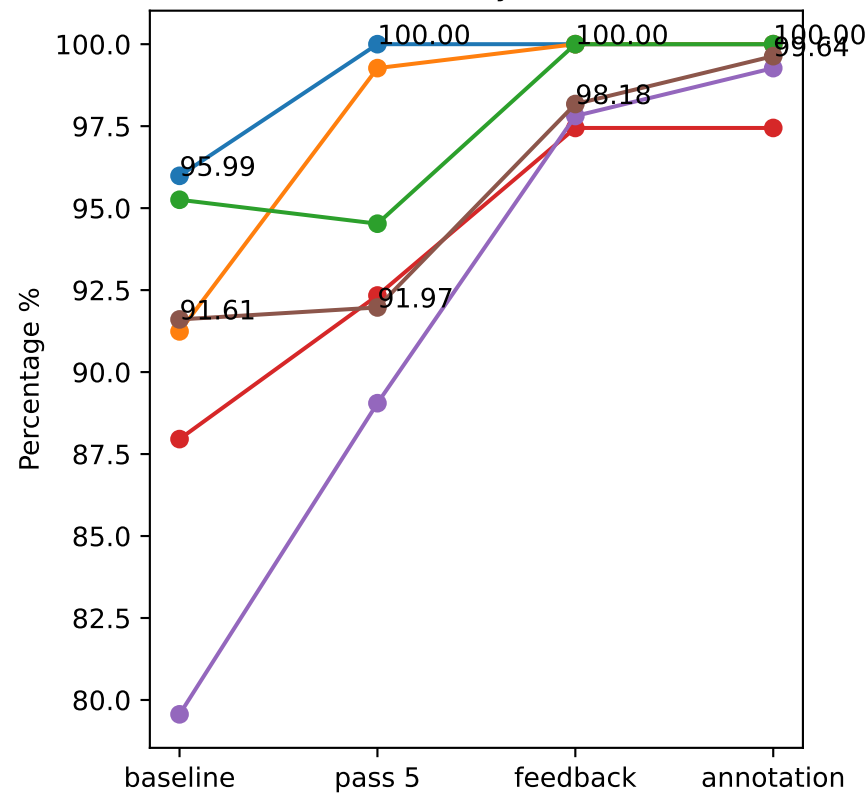

Medium

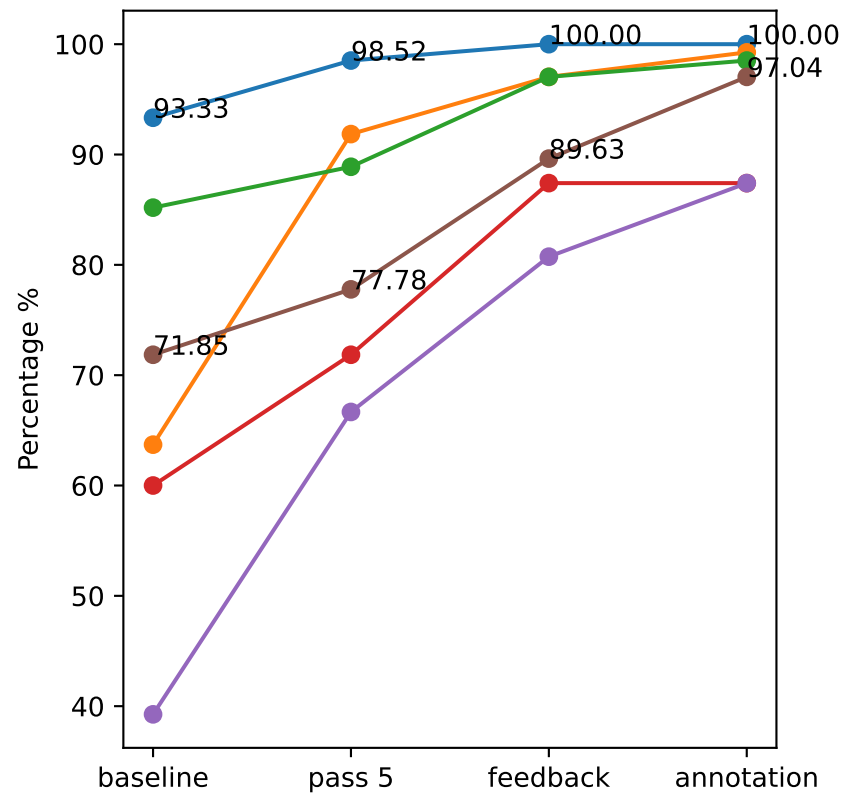

Hard

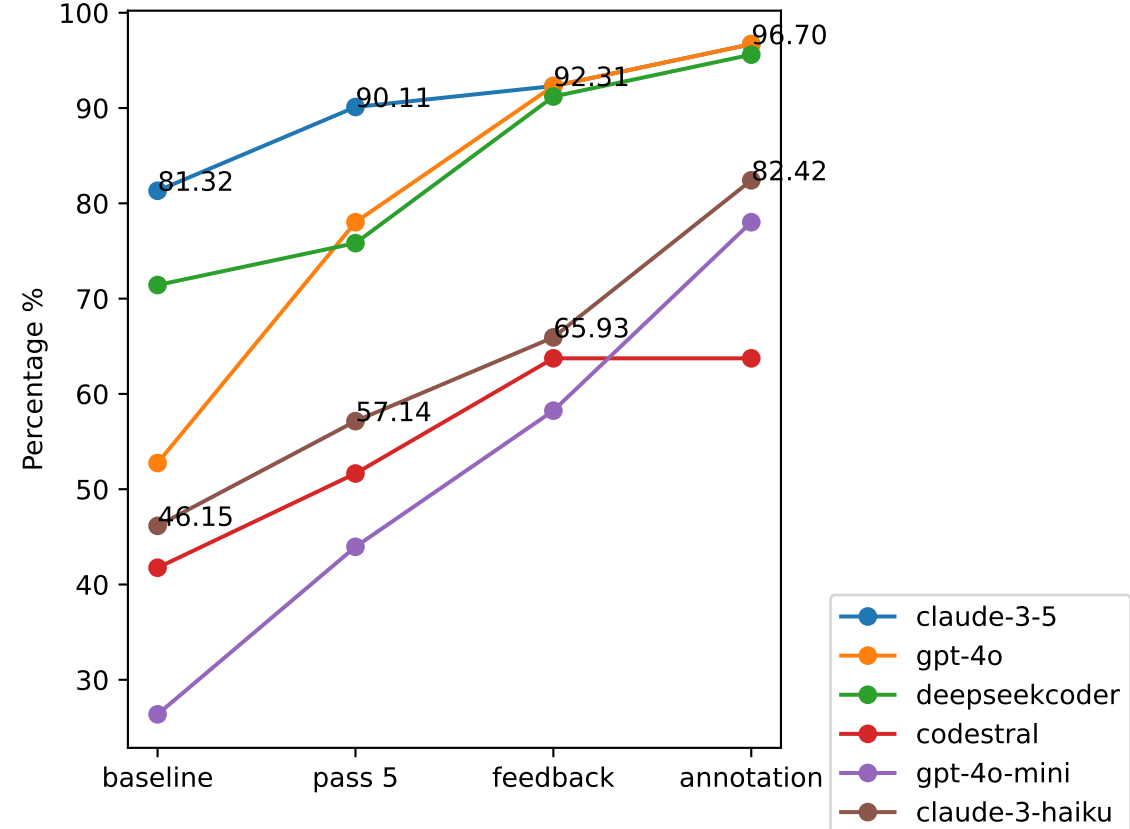

Supplement: supplementary_material [file attachment]

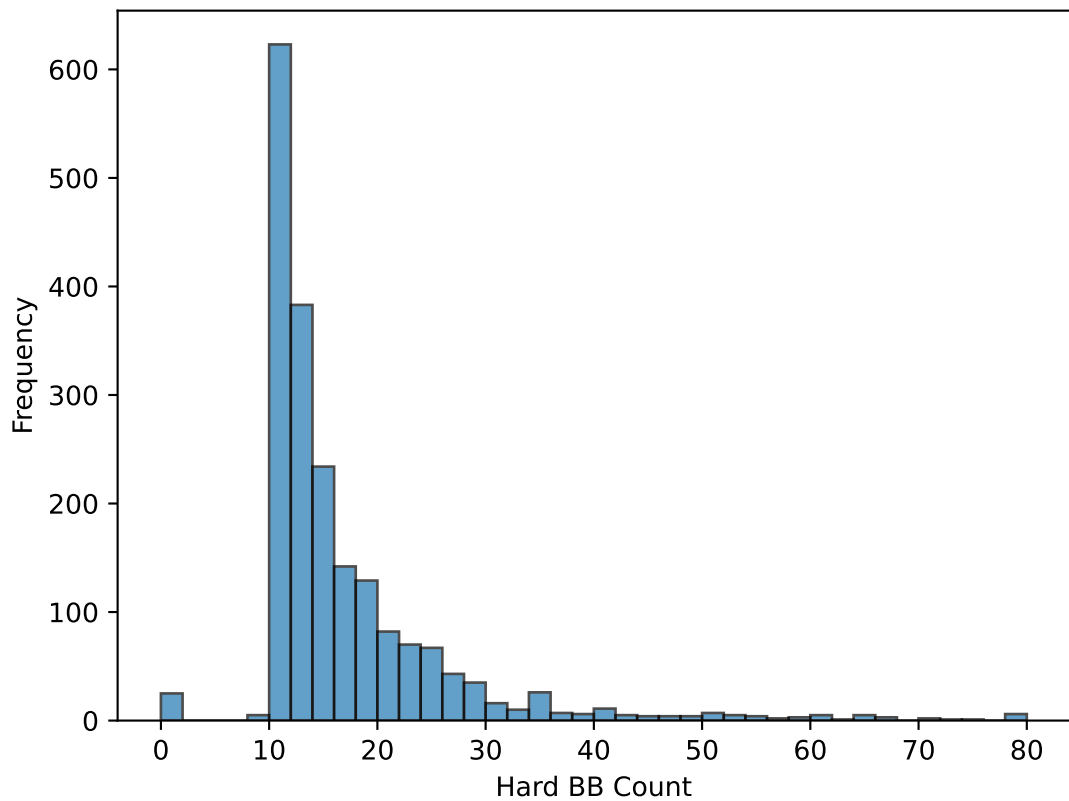

Supplement: supplementary_material [file attachment]

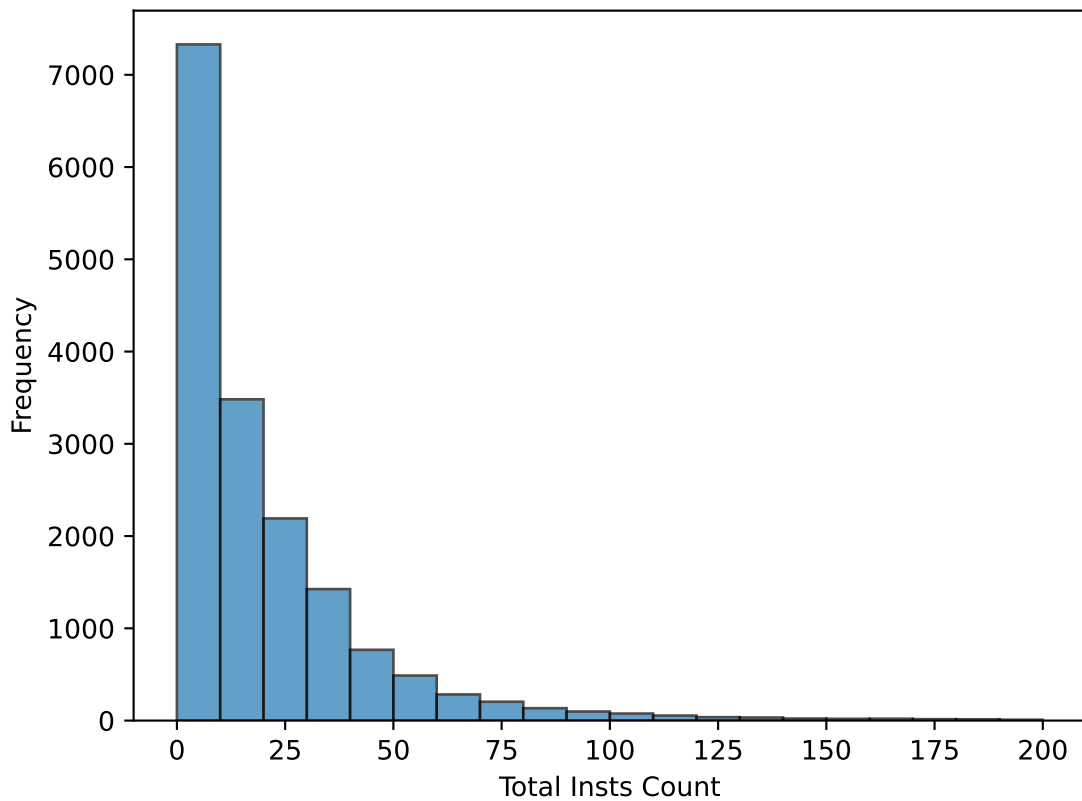

Supplement: supplementary_material [file attachment]
